# Supplementary material for: Acinetobacter baumannii K106 and K112: Two Structurally and Genetically Related 6-Deoxy-l-talose-Containing Capsular Polysaccharides
Source: MDPI journal article supplement (doi:10.3390/ijms22115641), 2021-05-26
Supplement: s1 [file s1]

## ***Acinetobacter baumannii* K106 and K112: Two structurally and genetically related 6-deoxy-L-talose-containing capsular polysaccharides**

**Anastasiya A. Kasimova <sup>a</sup>, Nikolay P. Arbatsky <sup>a</sup>, Ruth M. Hall <sup>b</sup>, Jacob Tickner <sup>c</sup>,  
Johanna J. Kenyon <sup>c</sup>, Michael M. Shneider <sup>d</sup>, Alina A. Dzhaparova <sup>a,e</sup>, Alexander S.  
Shashkov <sup>a</sup>, Alexander O. Chizhov <sup>a,\*</sup>, Anastasiya V. Popova <sup>f</sup>, Yuriy A. Knirel <sup>a</sup>**

<sup>a</sup> N. D. Zelinsky Institute of Organic Chemistry, Russian Academy of Sciences, Moscow, Russia;  
[nastia-kasimova979797@mail.ru](mailto:nastia-kasimova979797@mail.ru) (A.A.K.); [nikolay.arbatsky@gmail.com](mailto:nikolay.arbatsky@gmail.com) (N.P.A.);  
[shash@ioc.ac.ru](mailto:shash@ioc.ac.ru) (A.S.S); [chizhov@ioc.ac.ru](mailto:chizhov@ioc.ac.ru) (A.O.C.); [alina98d@gmail.com](mailto:alina98d@gmail.com) (A.A.D.);  
[yknirel@gmail.com](mailto:yknirel@gmail.com) (Y.A.K.)

<sup>b</sup> School of Life and Environmental Sciences, The University of Sydney, Sydney, Australia;  
[ruth.hall@sydney.edu.au](mailto:ruth.hall@sydney.edu.au) (R.M.H.)

<sup>c</sup> School of Biomedical Sciences, Faculty of Health, Queensland University of Technology,  
Brisbane, Australia; [j.tickner@uq.edu.au](mailto:j.tickner@uq.edu.au) (J.T); [johanna.kenyon@qut.edu.au](mailto:johanna.kenyon@qut.edu.au) (J.J.K.)

<sup>d</sup> M. M. Shemyakin and Yu. A. Ovchinnikov Institute of Bioorganic Chemistry, Russian  
Academy of Sciences, Moscow, Russia; [mm\\_shn@mail.ru](mailto:mm_shn@mail.ru) (M.M.S)

<sup>e</sup> D. I. Mendeleev University of Chemical Technology of Russia, Moscow, Russia;  
[alina98d@gmail.com](mailto:alina98d@gmail.com) (A.A.D.)

<sup>f</sup> State Research Center for Applied Microbiology and Biotechnology, Obolensk, Moscow  
Region, Russia; [popova\\_nastya86@mail.ru](mailto:popova_nastya86@mail.ru) (A.V.P.)

\* Correspondence: [chizhov@ioc.ac.ru](mailto:chizhov@ioc.ac.ru)

a.

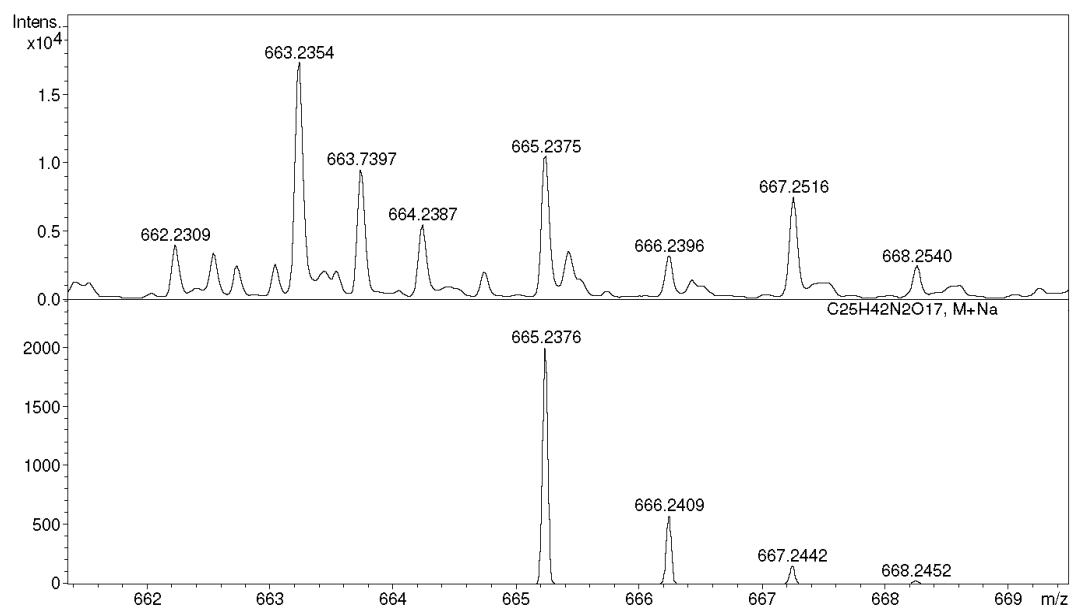

b.

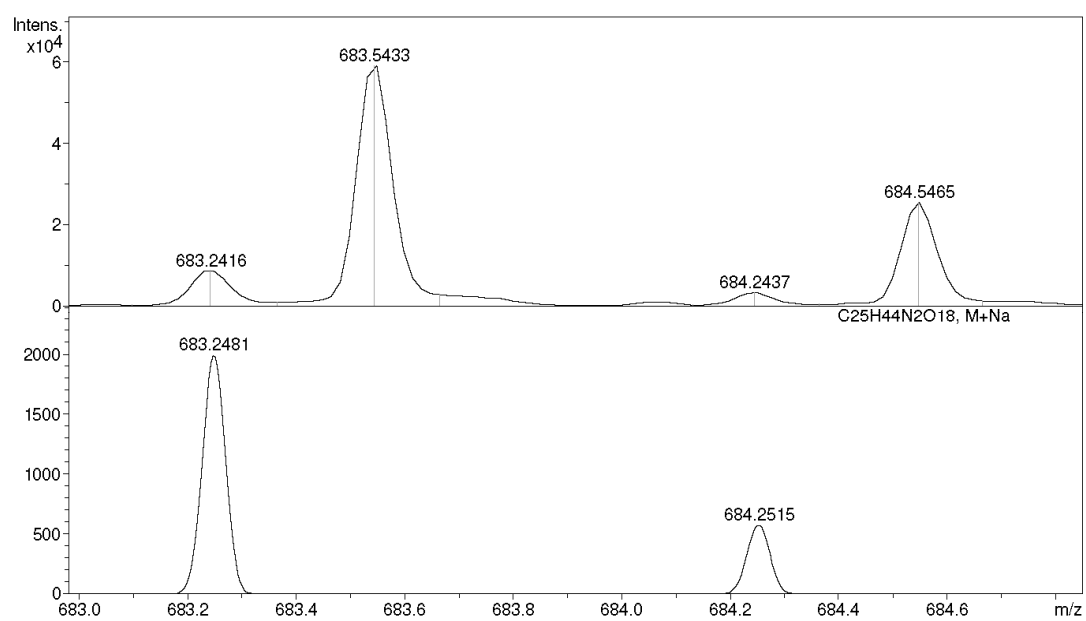

Figure S1, continued.

c.

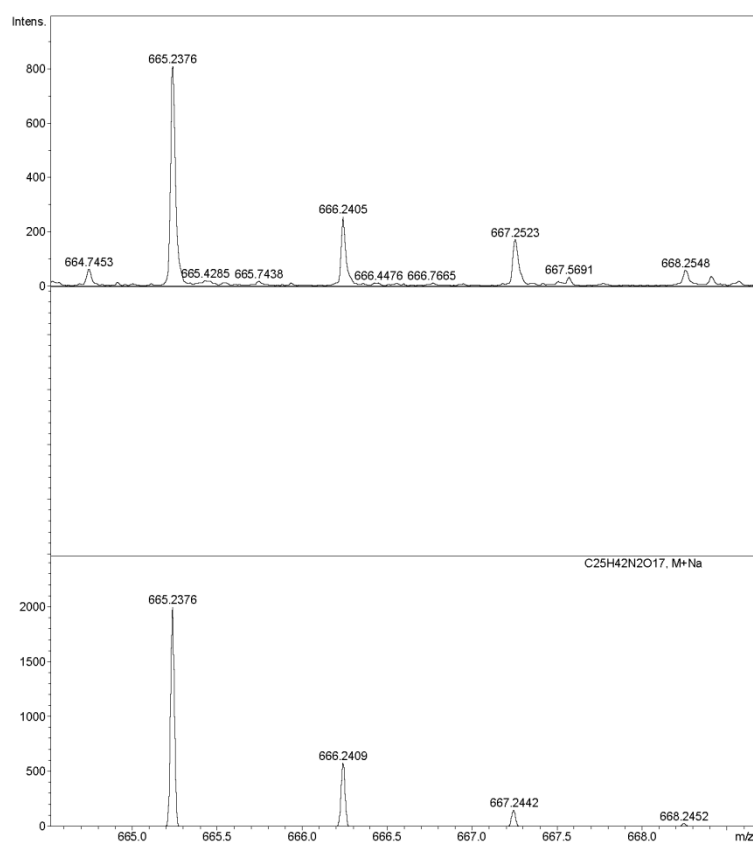

d.

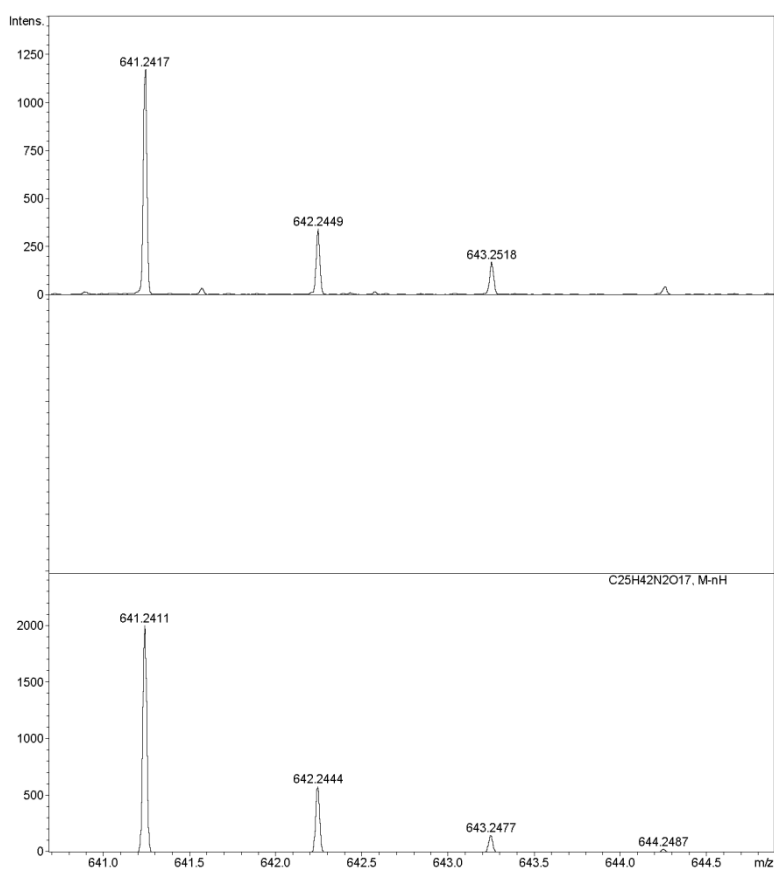

Figure S1, continued.

e.

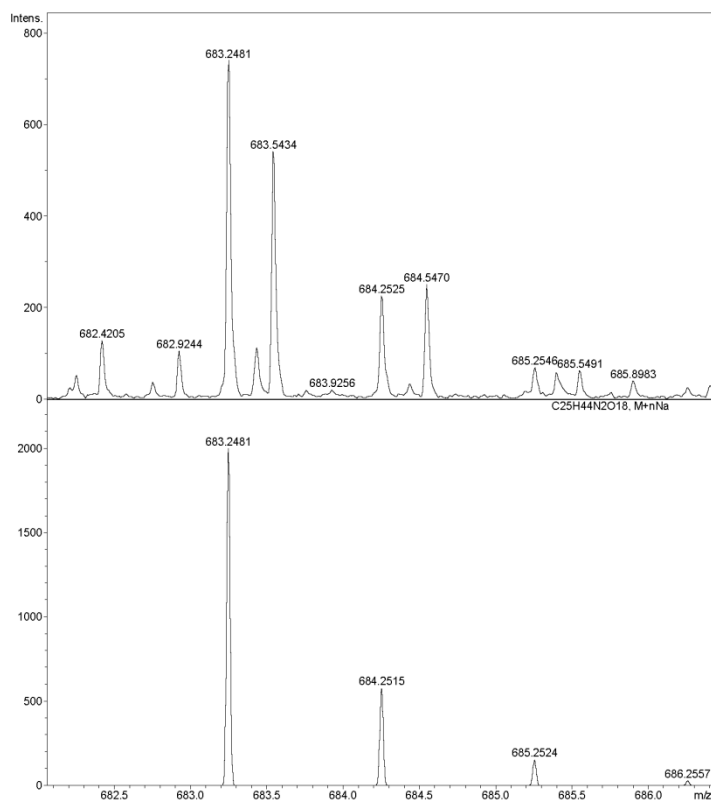

f.

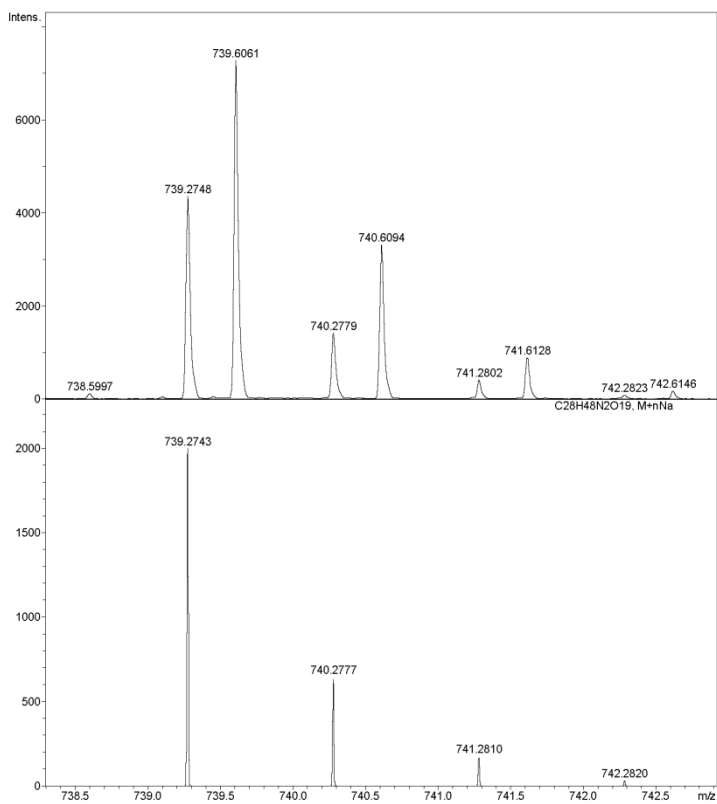

Figure S1, continued.

g.

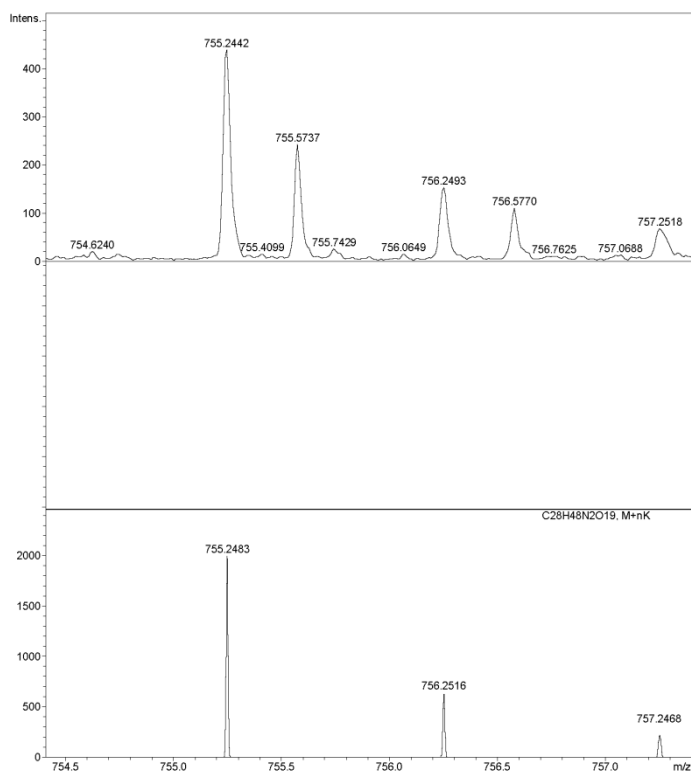

h.

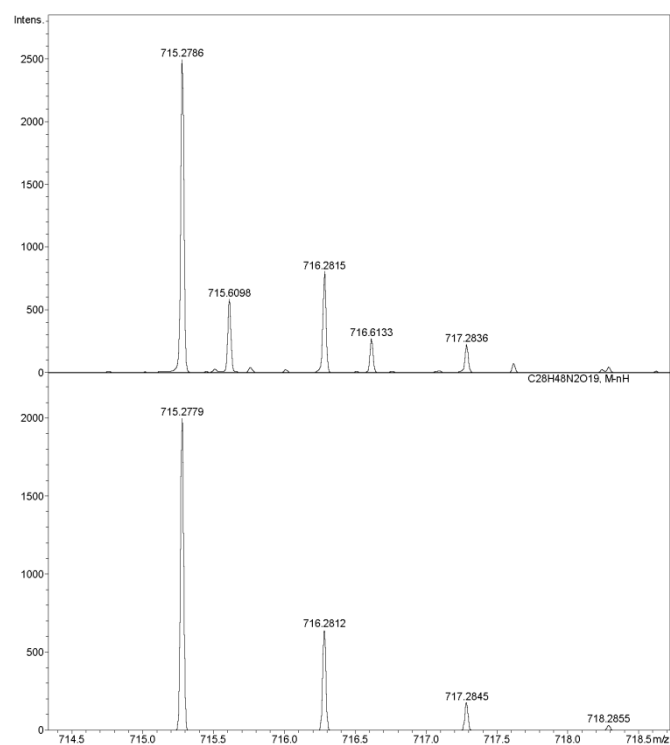

**Figure S1.** High-resolution, electrospray ionization mass spectra (HR ESI MS) of oligosaccharides OS1, OS2, and OS3. a. OS1, positive ion mode,  $[M+Na]^+$ . b. OS1 hydrate, positive ion mode,  $[M+Na]^+$ . c. OS2, positive ion mode,  $[M+Na]^+$ . d. OS2, negative ion mode,  $[M-H]^-$ . e. OS2 hydrate, positive ion mode,  $[M+Na]^+$ . f. OS3, positive ion mode,  $[M+Na]^+$ . g. OS3, positive ion mode,  $[M+K]^+$ . h. OS3, negative ion mode,  $[M-H]^-$ .

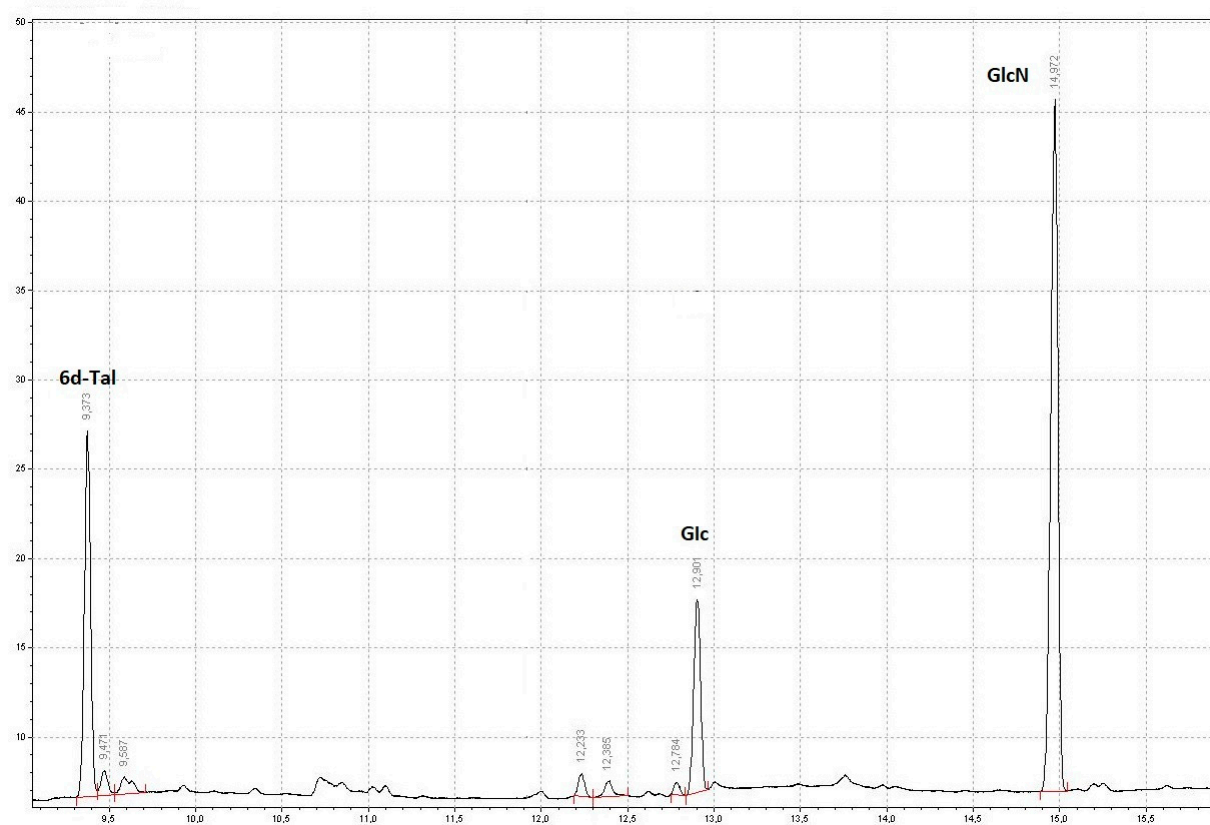

**Figure S2.** GLC chromatogram of sugar analysis of the K106 CPS of *A. baumannii* 48-1789.

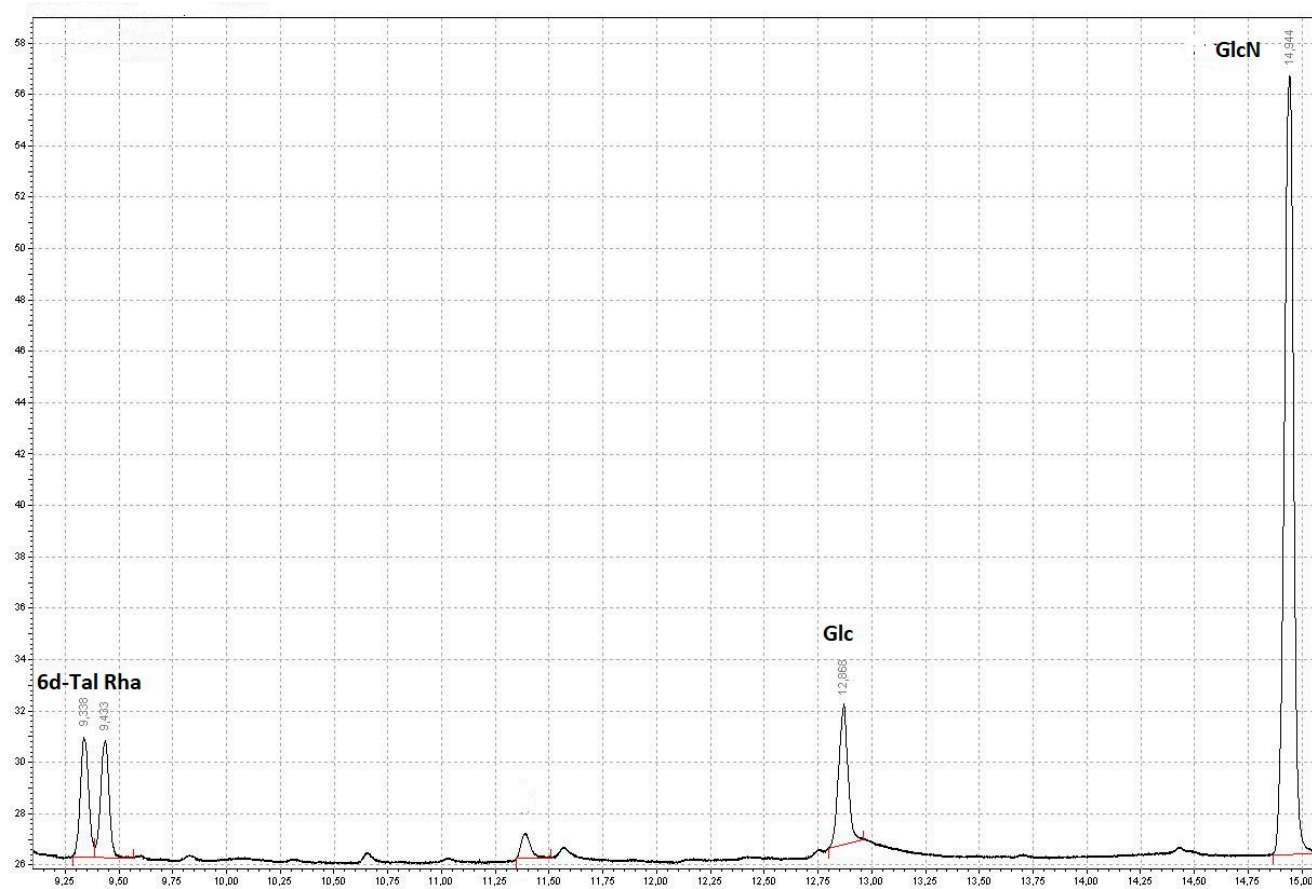

**Figure S3.** GLC chromatogram of sugar analysis of the K112 CPS of *A. baumannii* MAR24.

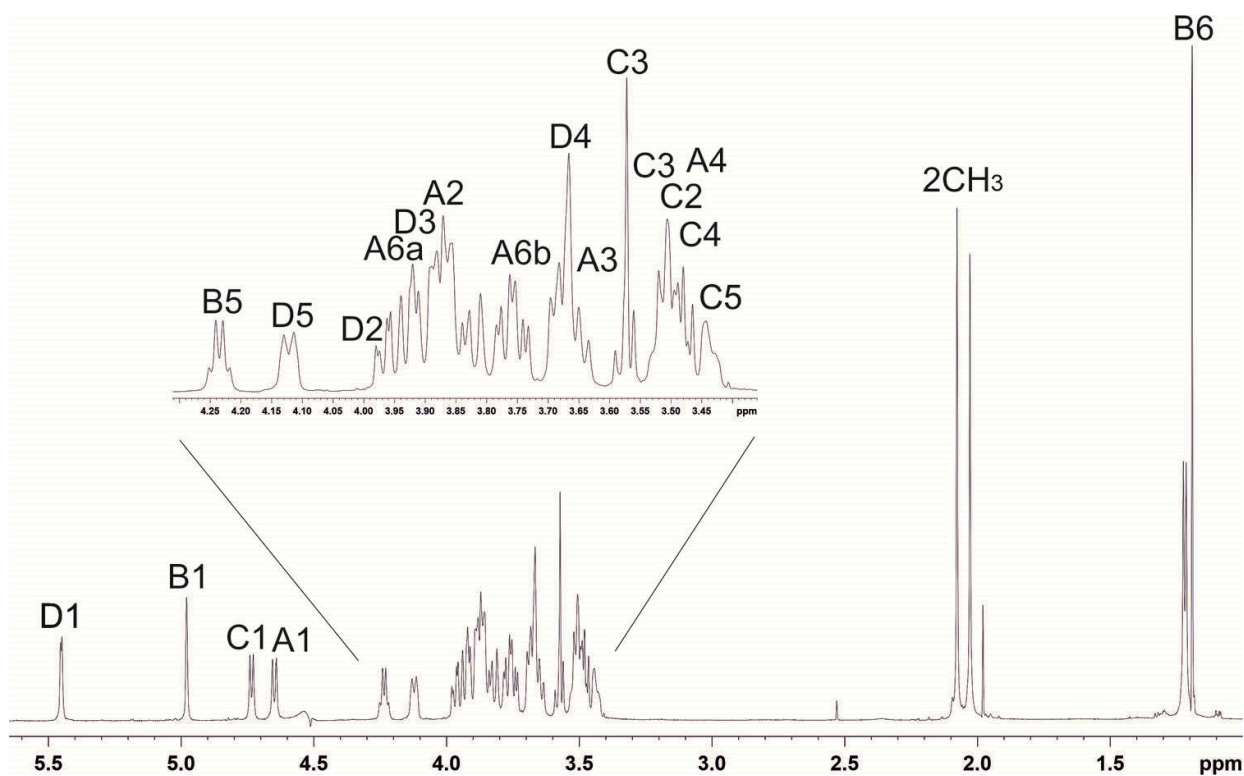

**Figure S4.** Part of  $^1\text{H}$  NMR spectrum of the K106 CPS of *A. baumannii* 48-1789. Numbers refer to H atoms in sugar residues denoted by letters as indicated in Table 1.

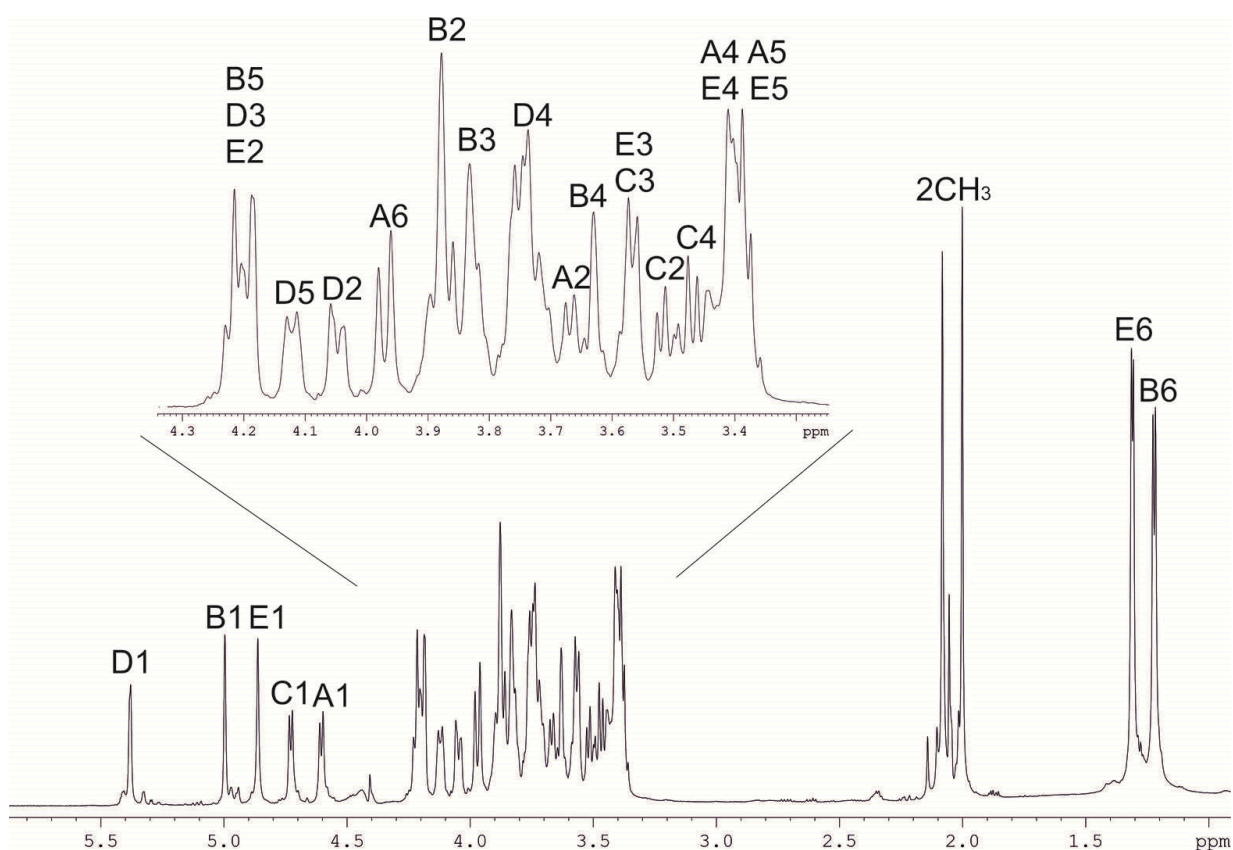

**Figure S5.** Part of  $^1\text{H}$  NMR spectrum of the K112 CPS of *A. baumannii* MAR24. Numbers refer to H atoms in sugar residues denoted by letters as indicated in Table 2.

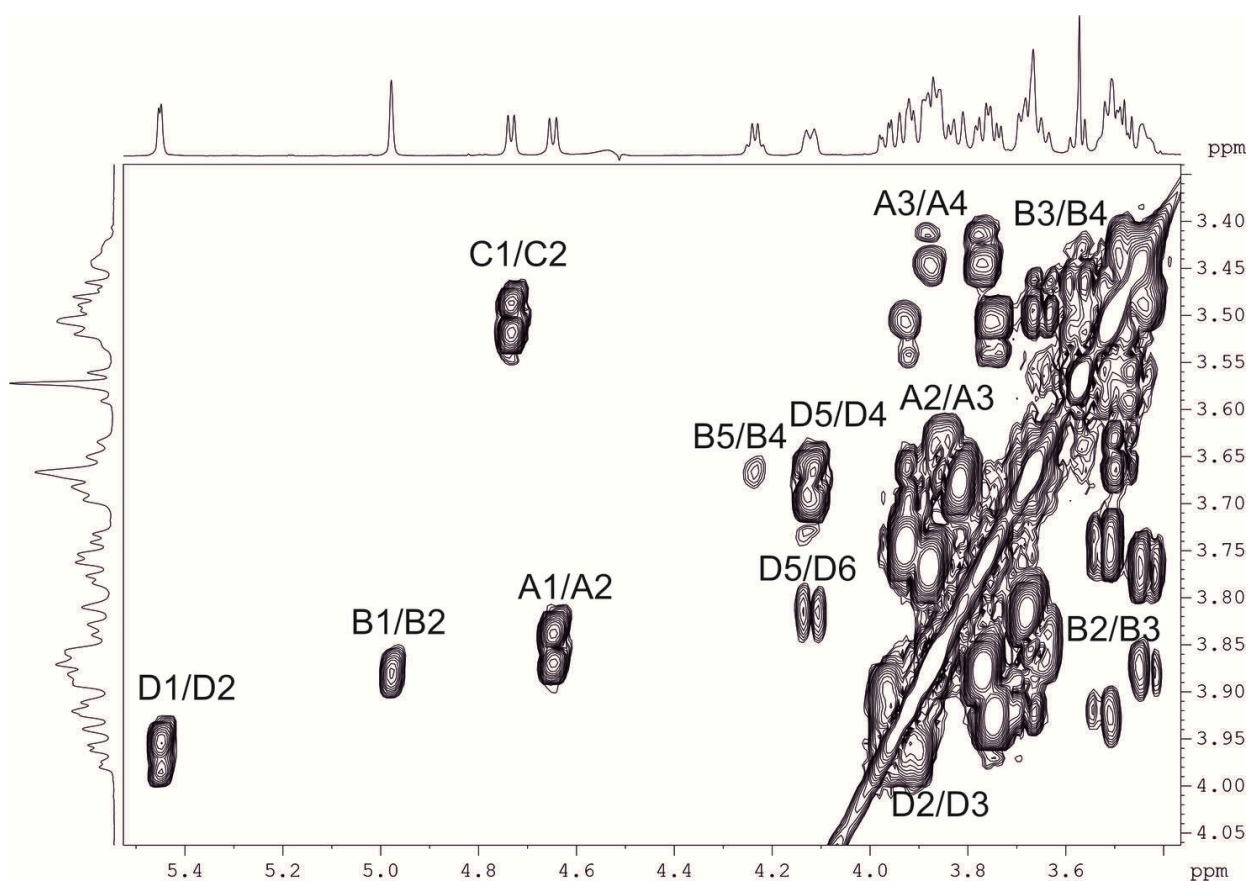

**Figure S6.** Part of a two-dimensional  $^1\text{H}$ ,  $^1\text{H}$  COSY spectrum of the K106 CPS of *A. baumannii* 48-1789. The corresponding parts of the  $^1\text{H}$  and  $^1\text{H}$  NMR spectra are shown along the vertical and horizontal axes. Numbers refer to H/H pairs in sugar residues denoted by letters as indicated in Table 1.

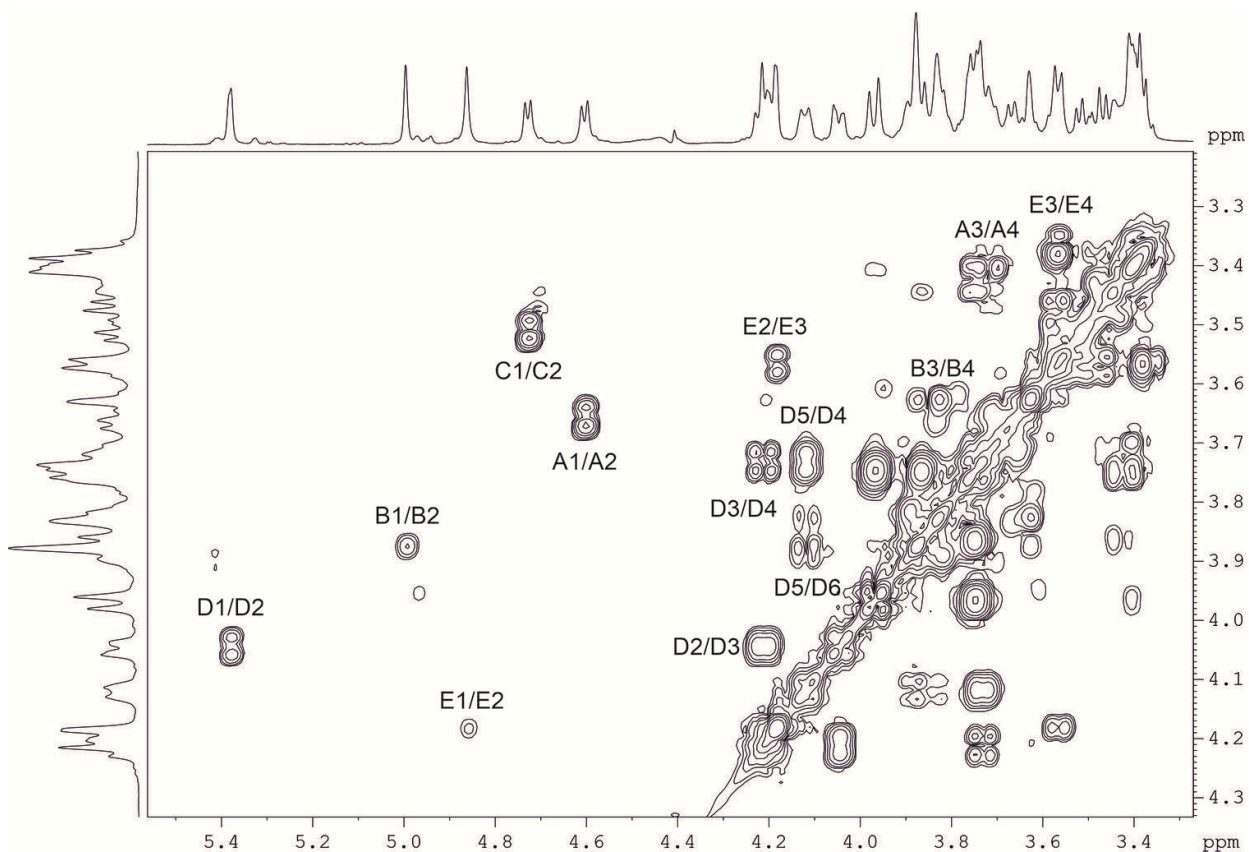



**Figure S7.** Part of a two-dimensional  $^1\text{H}$ ,  $^1\text{H}$  COSY spectrum of the K112 CPS of *A. baumannii* MAR24. The corresponding parts of the  $^1\text{H}$  and  $^1\text{H}$  NMR spectra are shown along the vertical and horizontal axes. Numbers refer to H/H pairs in sugar residues denoted by letters as indicated in Table 2.

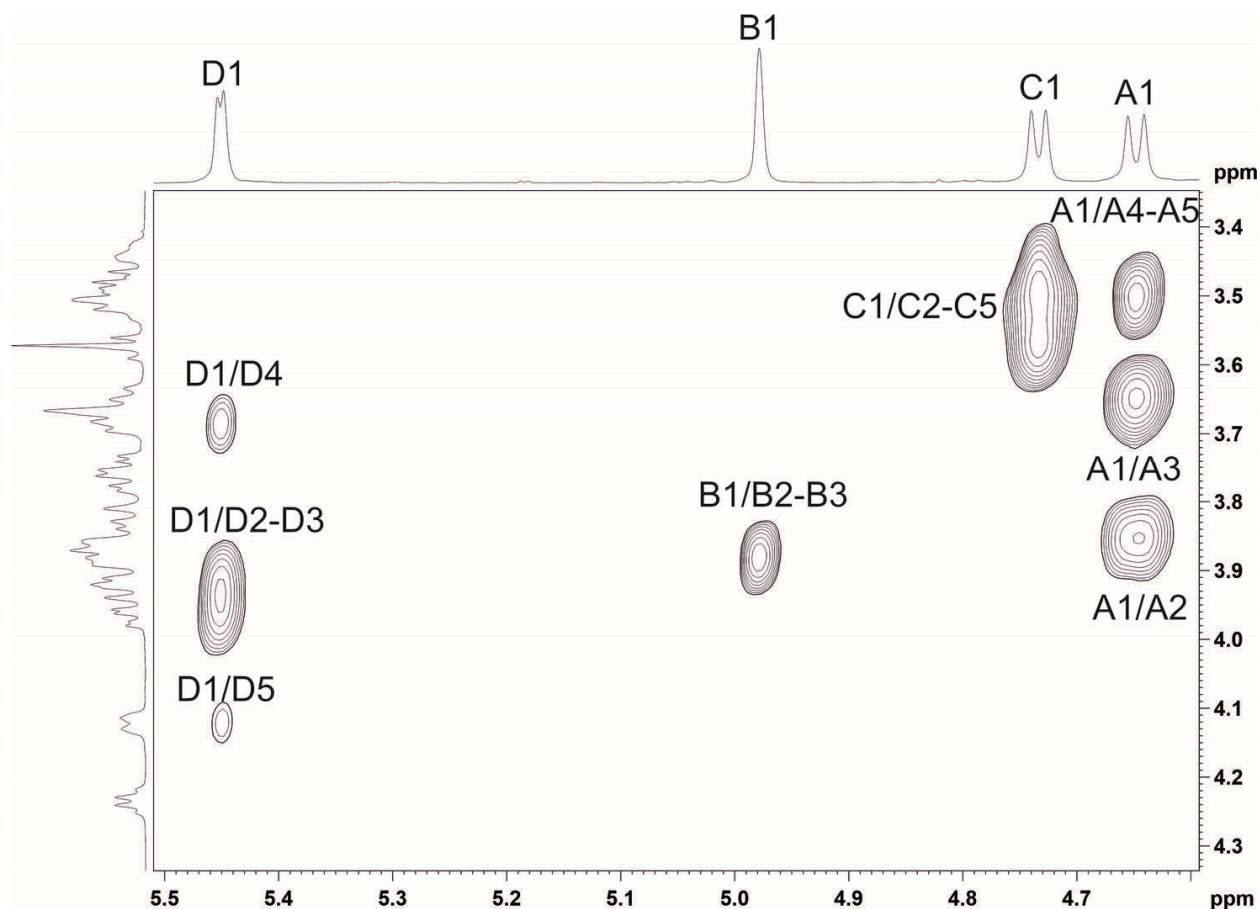

**Figure S8.** Part of a two-dimensional  $^1\text{H}$ ,  $^1\text{H}$  TOCSY spectrum of the K106 CPS of *A. baumannii* 48-1789. The corresponding parts of the  $^1\text{H}$  and  $^1\text{H}$  NMR spectra are shown along the vertical and horizontal axes. Numbers refer to H/H pairs in sugar residues denoted by letters as indicated in Table 1.

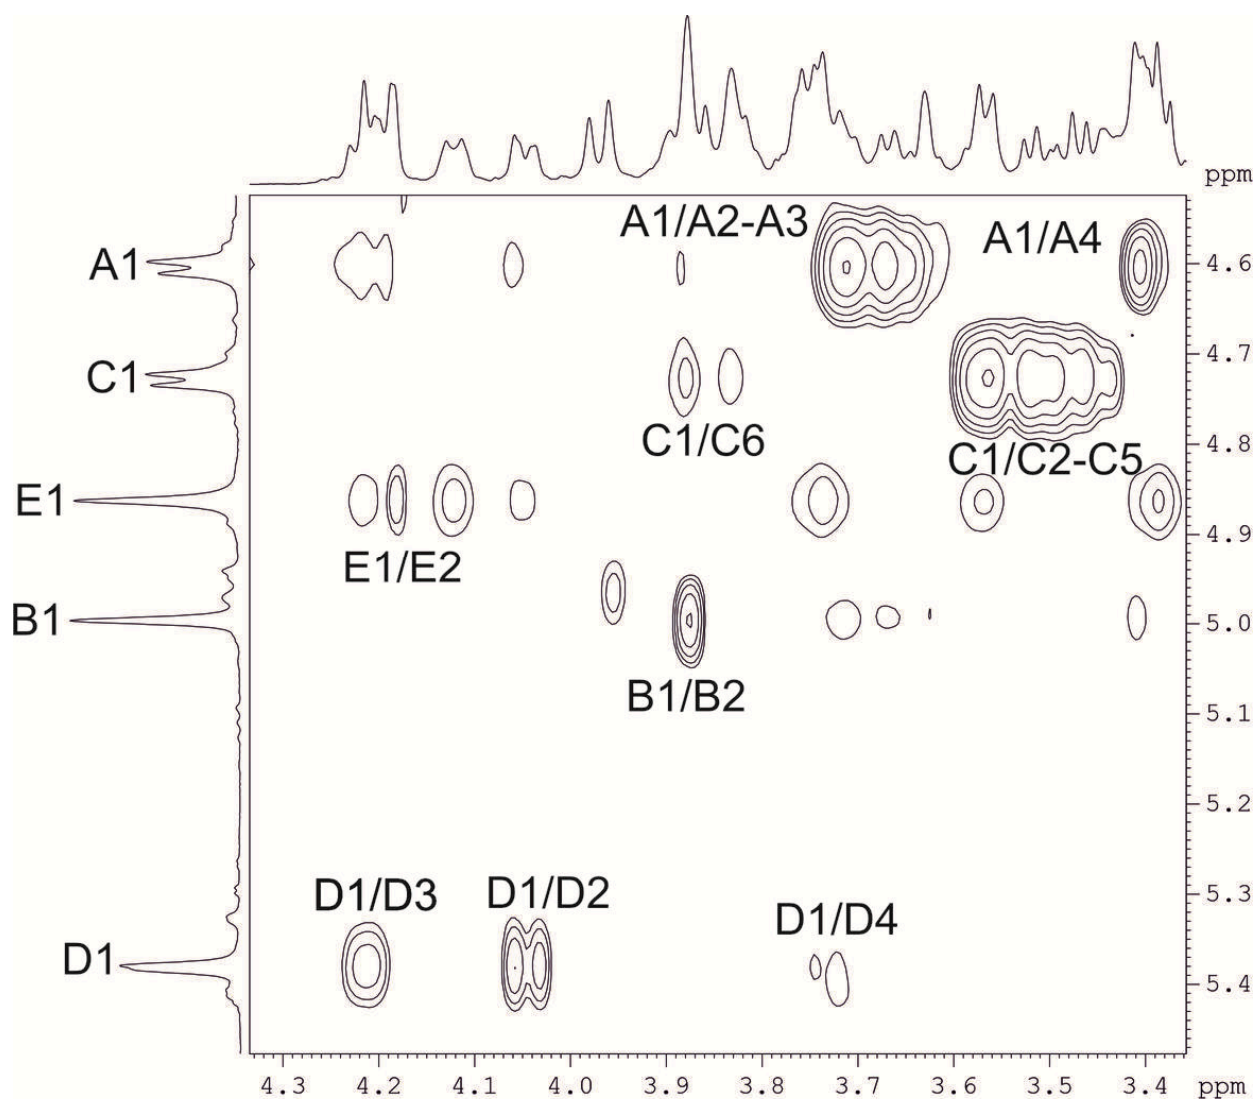

**Figure S9.** Part of a two-dimensional  $^1\text{H}$ ,  $^1\text{H}$  TOCSY spectrum of the K112 CPS of *A. baumannii* MAR24. The corresponding parts of the  $^1\text{H}$  and  $^1\text{H}$  NMR spectra are shown along the vertical and horizontal axes. Numbers refer to H/H pairs in sugar residues denoted by letters as indicated in Table 2.

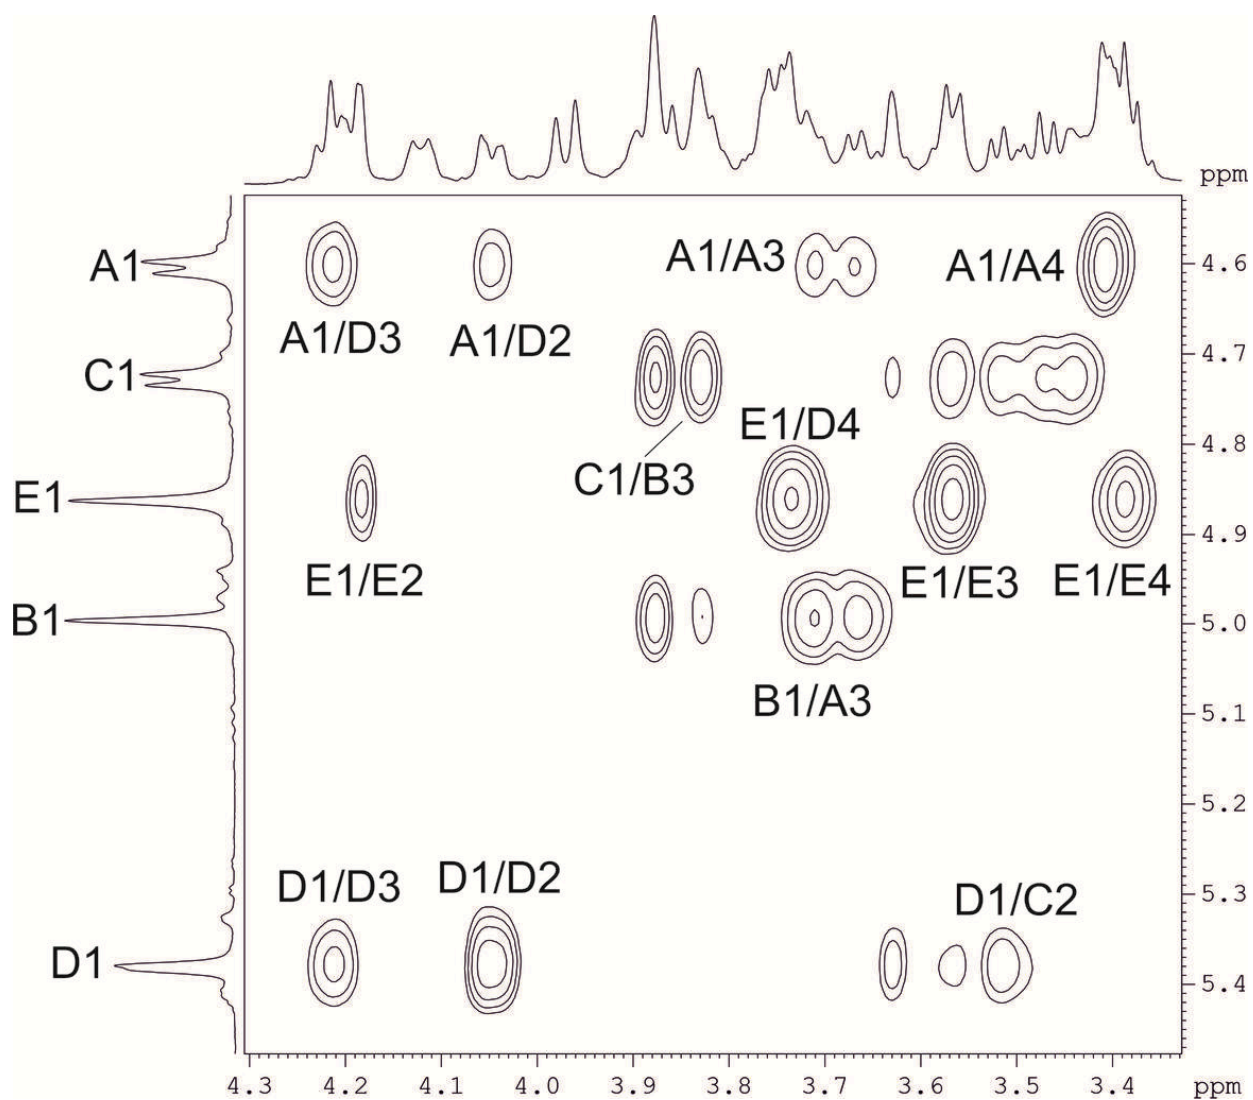

**Figure S10.** Part of a two-dimensional  $^1\text{H}$ ,  $^1\text{H}$  ROESY spectrum of the K112 CPS of *A. baumannii* MAR24. The corresponding parts of the  $^1\text{H}$  and  $^1\text{H}$  NMR spectra are shown along the vertical and horizontal axes. Numbers refer to H/H pairs in sugar residues denoted by letters as indicated in Table 2.

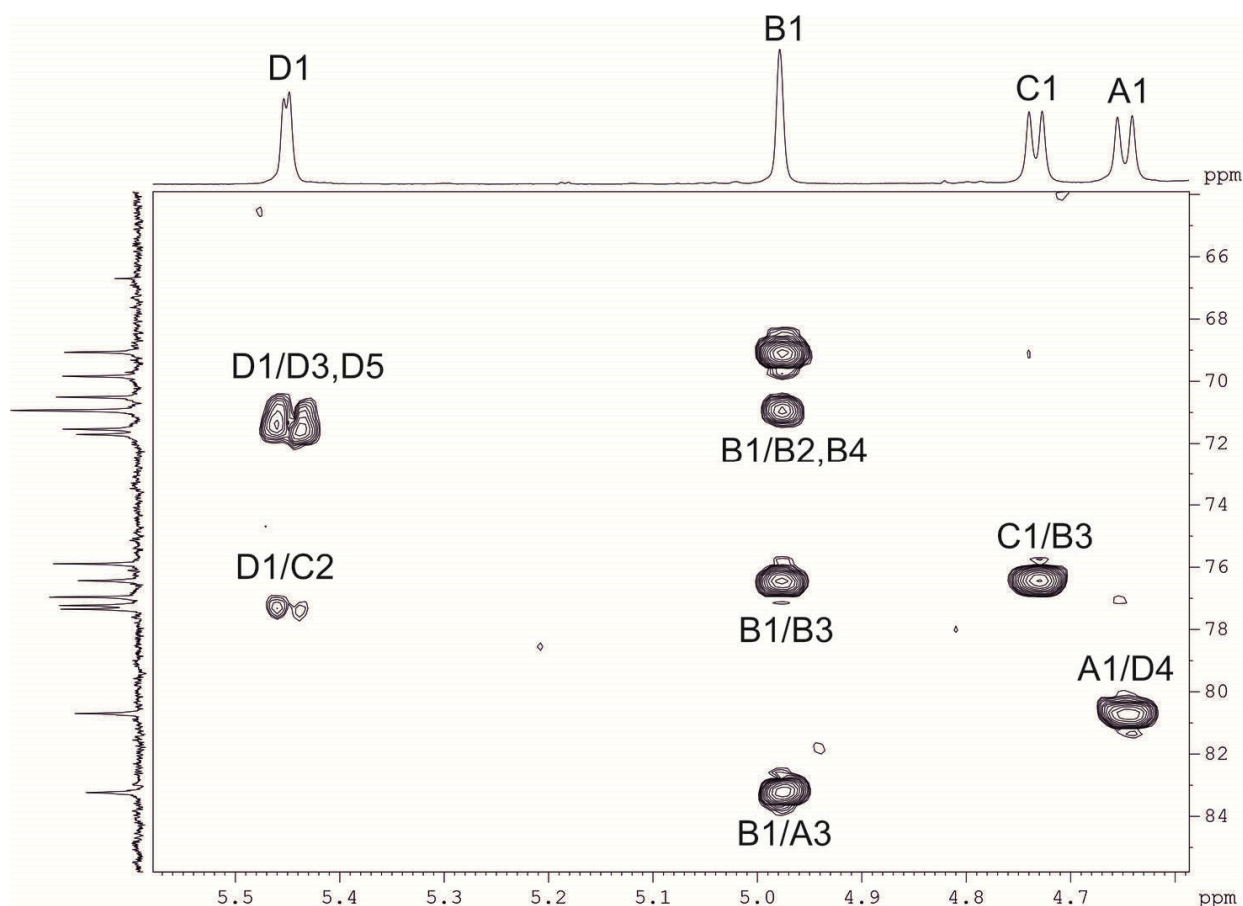

**Figure S11.** Part of a two-dimensional  $^1\text{H}$ ,  $^{13}\text{C}$  HMBC spectrum of the K106 CPS of *A. baumannii* 48-1789. The corresponding parts of the  $^1\text{H}$  and  $^{13}\text{C}$  NMR spectra are shown along the horizontal and vertical axes, respectively. Numbers refer to H/C pairs in sugar residues denoted by letters as indicated in Table 1.

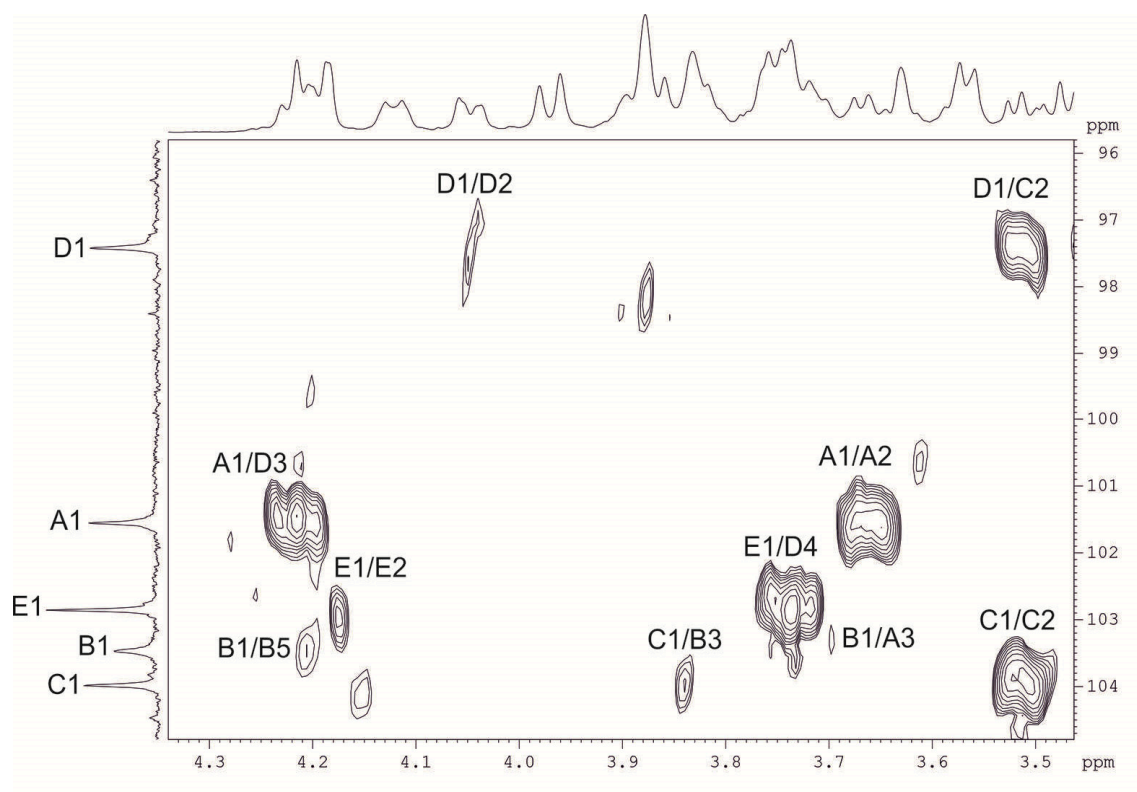

**Figure S12.** Part of a two-dimensional  $^1\text{H}$ ,  $^{13}\text{C}$  HMBC spectrum of the K112 CPS of *A. baumannii* MAR24. The corresponding parts of the  $^1\text{H}$  and  $^{13}\text{C}$  NMR spectra are shown along the horizontal and vertical axes, respectively. Numbers refer to C/H pairs in sugar residues denoted by letters as indicated in Table 2.

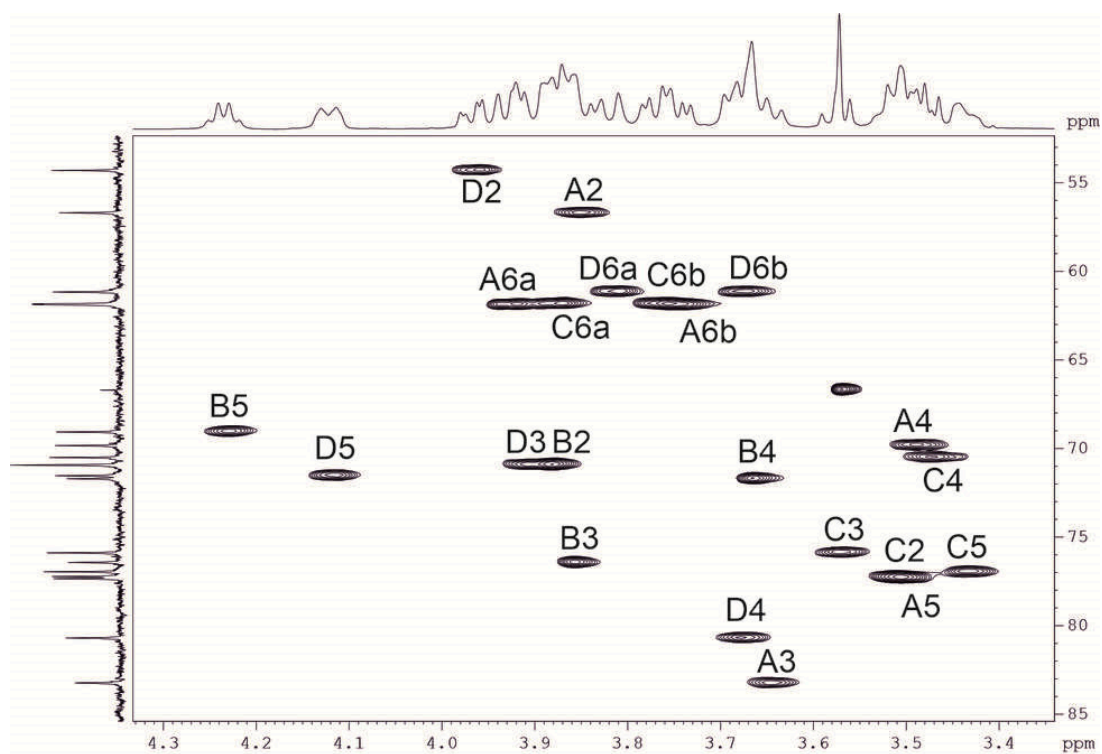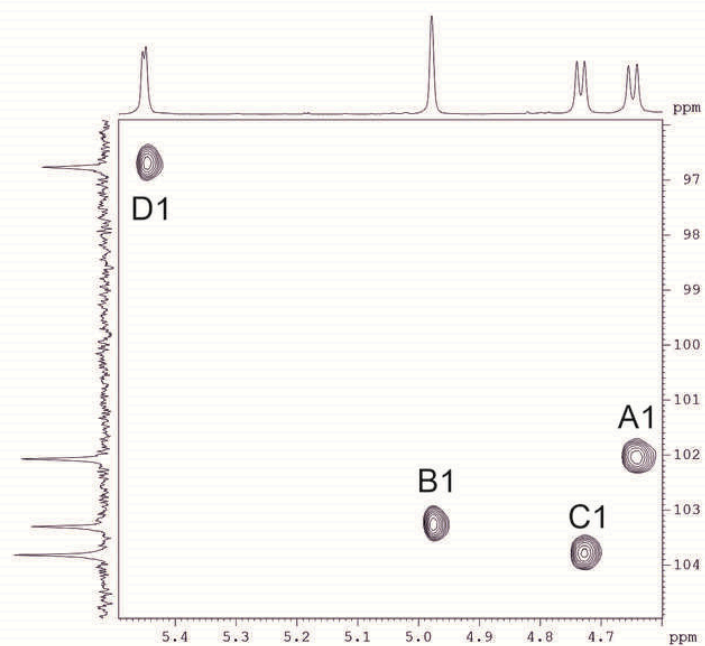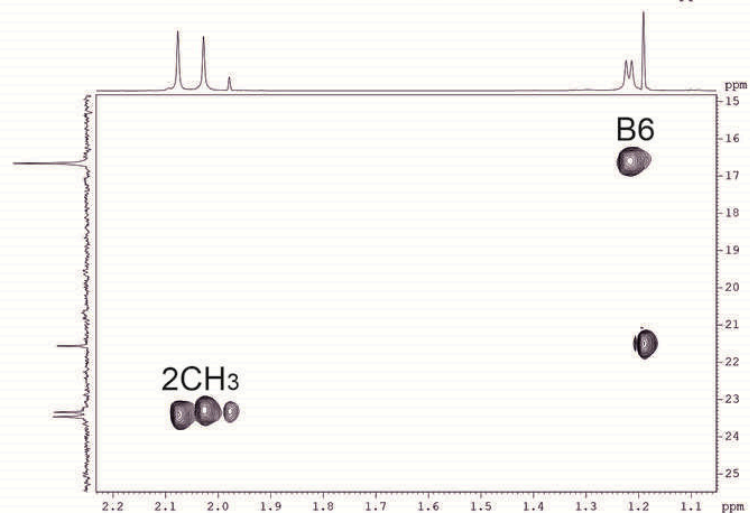

**Figure S13.** Parts of a two-dimensional  $^1\text{H}$ ,  $^{13}\text{C}$  HSQC spectrum of the K106 CPS of *A. baumannii* 48-1789. The corresponding parts of the  $^1\text{H}$  and  $^{13}\text{C}$  NMR spectra are shown along the horizontal and vertical axes, respectively. Numbers refer to C/H pairs in sugar residues denoted by letters as indicated in Table 1.

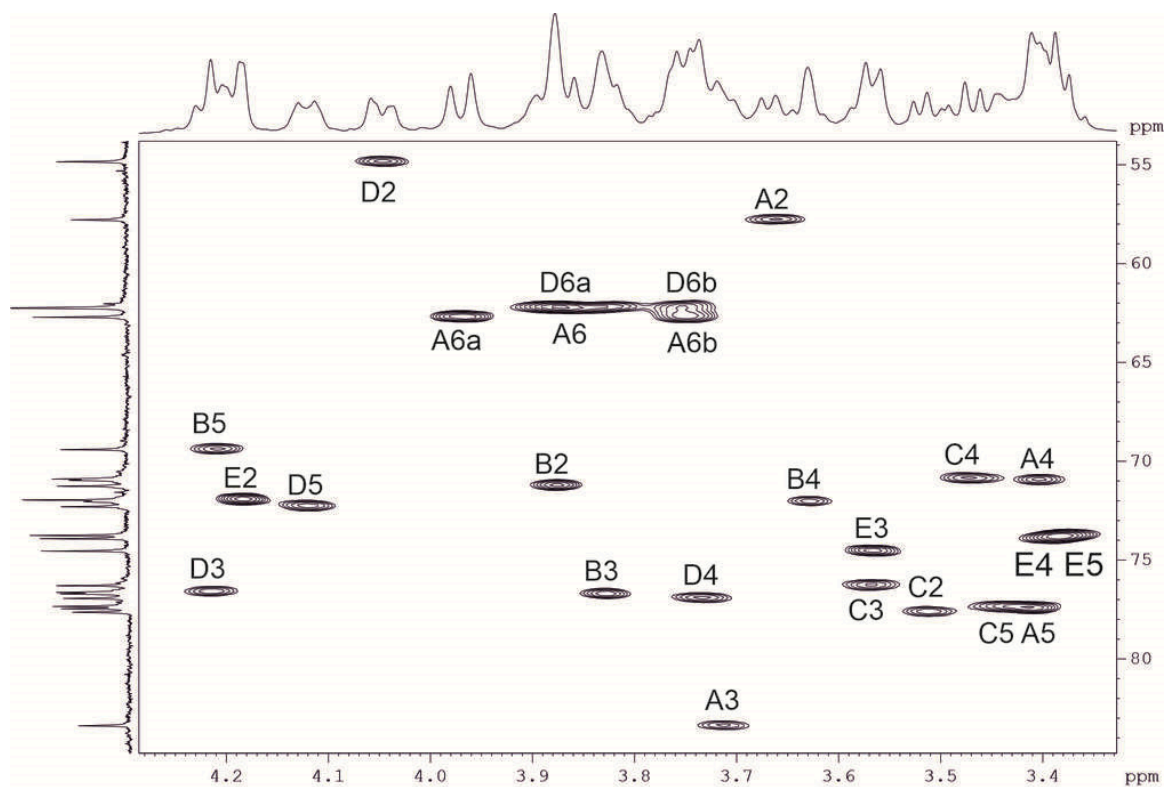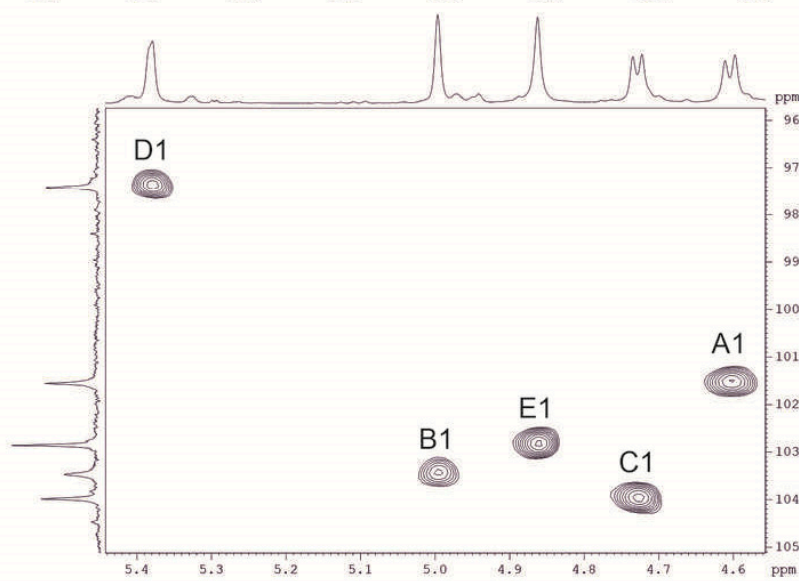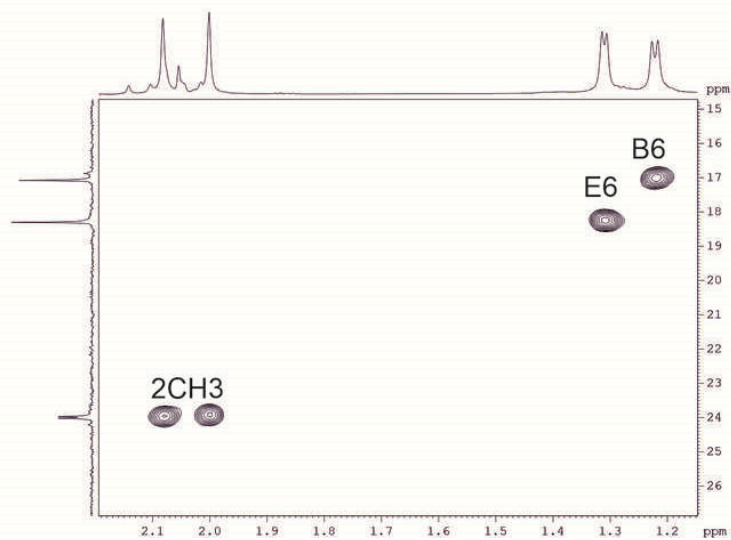



**Figure S14.** Parts of a two-dimensional  $^1\text{H}$ ,  $^{13}\text{C}$  HSQC spectrum of the K112 CPS of *A. baumannii* MAR24. The corresponding parts of the  $^1\text{H}$  and  $^{13}\text{C}$  NMR spectra are shown along the horizontal and vertical axes, respectively. Numbers refer to C/H pairs in sugar residues denoted by letters as indicated in Table 2.

In the reference list below, papers concerning identification, isolation and biosynthesis of 6-deoxy-L(D)-talose are presented.

## References.

1. Knirel, Y. A.; Qian, C.; Senchenkova, S. N.; Guo, X.; Shashkov, A. S.; Chizhov, A. O.; Perepelov, A. V.; Liu, B. Structure of the  $\beta$ -L-fucopyranosyl phosphate-containing *O*-specific polysaccharide of *Escherichia coli* O84. *Internat. J. Biol. Macromol.* **2016**, 88, 578—585.
2. Maki, M.; Jarvinen, N.; Rabina, J.; Maaheimo, H.; Mattila, P.; Renkonen, R. Cloning and functional expression of a novel GDP-6-deoxy-D-talose synthetase from *Actinobacillus actinomycetemcomitans*. *Glycobiology* **2003**, 13, 295—303.
3. Suzuki, N.; Nakano, Y.; Yoshida, Y.; Nezu, T.; Terada, Y.; Yamashita, Y.; Koga, T. Guanosine diphosphate-4-keto-6-deoxy-D-mannose reductase in the pathway for the synthesis of GDP-6-deoxy-D-talose in *Actinobacillus actinomycetemcomitans*. *Eur. J. Biochem.*, **2002**, 269, 5963—5971.
4. Suzuki, N.; Nakano, Y.; Yoshida, Y.; Nakao, H.; Yamashita, Y.; Koga, T. Genetic analysis of the gene cluster for the synthesis of serotype a-specific polysaccharide antigen in *Actinobacillus actinomycetemcomitans*. *Biochim. Biophys. Acta — Gen. Struct. Exp.* **2000**, 1517, 135—138.
5. Katzenellenbogen, E.; Kocharova, N.A.; Zatonsky, G.V.; Bogulska, M.; Witkowska, D.; Shashkov, A.S.; Knirel, Y.A.; Romanowska, E. Structure of the *O*-specific polysaccharide of *Hafnia alvei* 23 having an oligosaccharide-phosphate repeating unit. *J. Carbohydr. Chem.* **1999**, 18, 545—558.
6. Zahringer, U.; Rettenmaier, H.; Moll, H.; Senchenkova, S.N.; Knirel, Y.A. Structure of a new 6-deoxy- $\alpha$ -D-talan from *Burkholderia (Pseudomonas) plantarii* strain DSM 6535, which is different from the *O*-chain of the lipopolysaccharide. *Carbohydr. Res.* **1997**, 300, 143-151.

7. Perry, M.B.; Maclean, L.M.; Brisson, J.R.; Wilson, M.E. Structures of the antigenic O-polysaccharides of lipopolysaccharides produced by *Actinobacillus actinomycetemcomitans* serotypes a, c, d and e. *Eur. J. Biochem.* **1996**, 242, 682—688.
8. Shibuya, N.; Amano, K.; Azuma, J.; Nishihara, T.; Kitamura, Y.; Noguchi, T.; Koga, T. 6-Deoxy-D-Talan and 6-deoxy-L-talan — Novel serotype-specific polysaccharide antigens from *Actinobacillus actinomycetemcomitans*. *J. Biol. Chem.* **1991**, 266, 16318—16323
9. Andersson, M.; Ratnayake, S.; Kenne, L.; Ericsson, L.; Stack, R.J. Structural studies of the extracellular polysaccharide from *Butyrivibrio fibrisolvens* strain X6C61. *Carbohydr. Res.* **1993**, 246, 291—301.
10. Stack, R.J. Identification of 6-deoxy-D-talose in an extracellular polysaccharide produced by *Butyrivibrio fibrisolvens* strain X6C61. *Carbohydr. Res.* **1989**, 189, 281—288.
